# Supplementary material for: Graph-based pan-genome reveals structural and sequence variations related to agronomic traits and domestication in cucumber
Source: PubMed Central journal article supplement (PMC8813957; doi:10.1038/s41467-022-28362-0), 2022-02-03
Supplement: 41467_2022_28362_MOESM1_ESM.pdf [file 41467_2022_28362_MOESM1_ESM.pdf]

1 **Graph-based pan-genome reveals structural and sequence variations related**  
2 **to agronomic traits and domestication in cucumber**

3

4

*Li et al.*

5

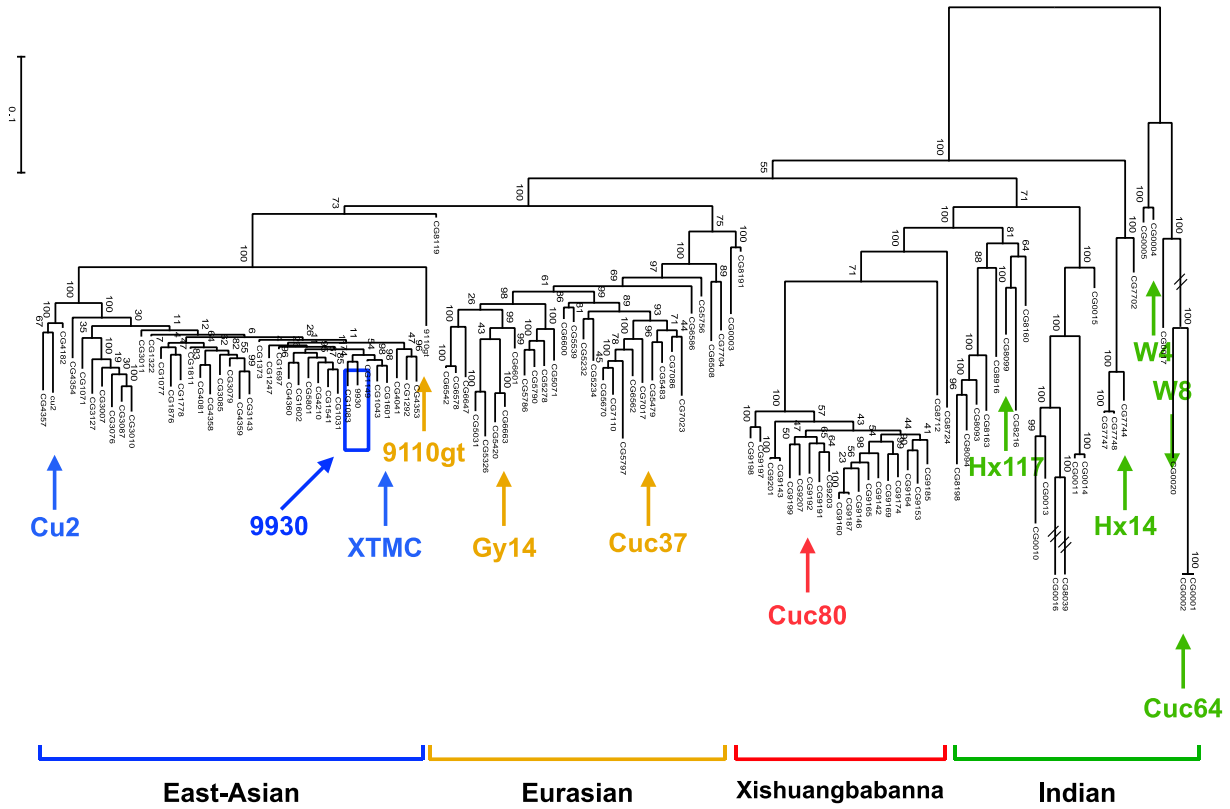

7 **Supplementary Fig. 1. Positions of the 12 cucumber accessions used in this study on the**  
 8 **phylogenetic tree.** The tree of 115 cucumber accessions is modified from our previous study<sup>1</sup>.  
 9 Source data are provided as a Source Data file.

10

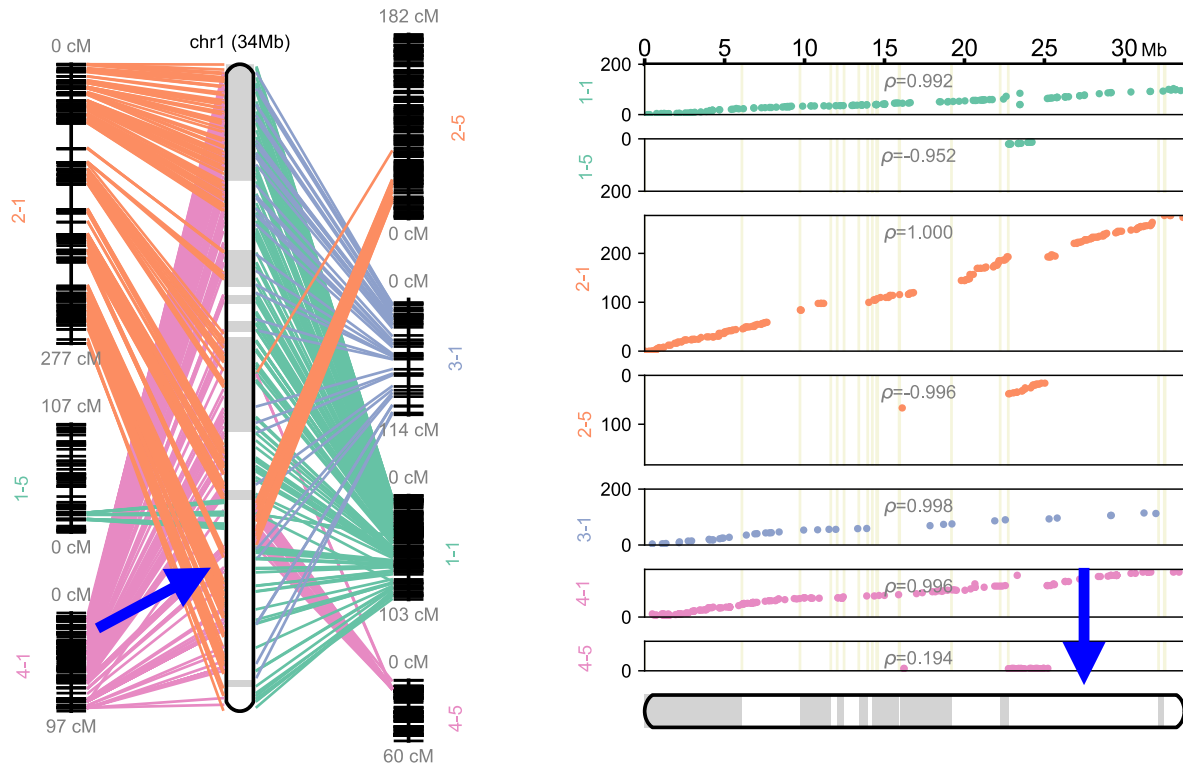

11

12 **Supplementary Fig. 2. An example of splitting a misassembled contig (tig00002967\_pilon) of**  
 13 **Cuc64 based on four linkage maps. Blue arrow indicates the problematic contig.**

14

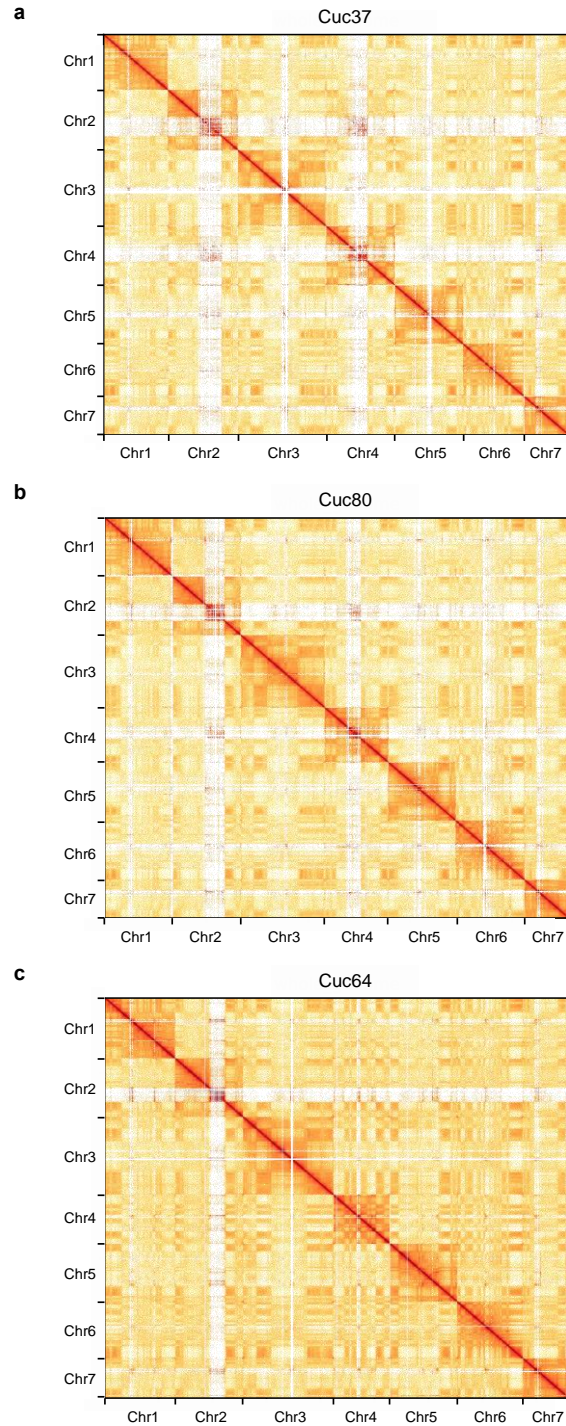

15

16 **Supplementary Fig. 3. Hi-C interaction heatmaps at the 100-kb resolution. a,** Hi-C heatmap  
 17 of the Cuc37 genome. **b,** Hi-C heatmap of the Cuc80 genome. **c,** Hi-C heatmap of the Cuc64  
 18 genome. Red color indicates strong interactions.

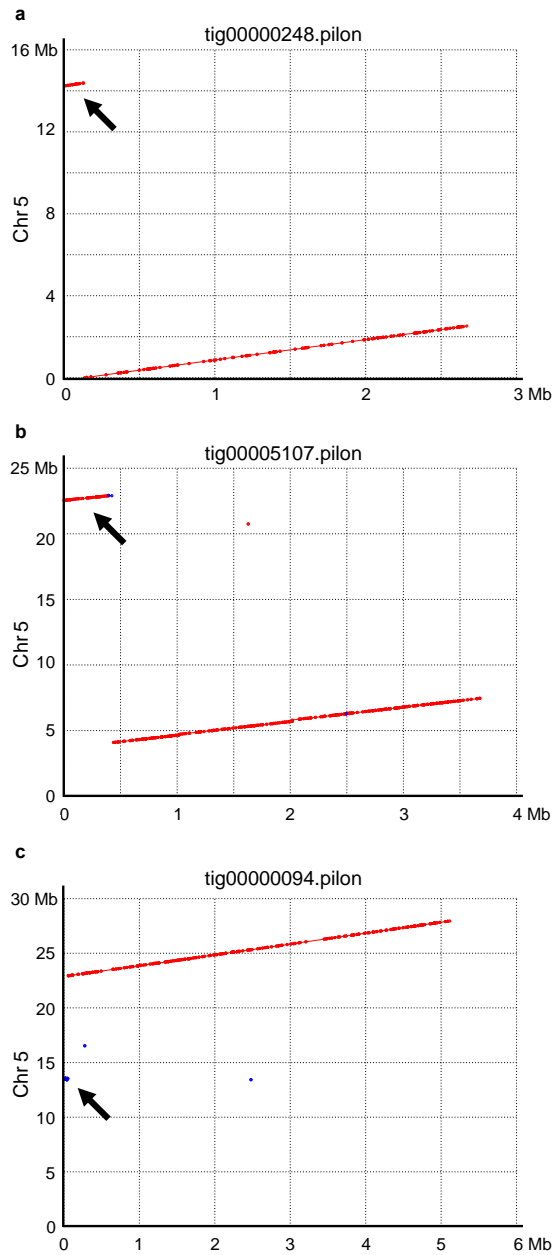

19

20 **Supplementary Fig. 4. Breakpoint evidence of the three large inversions on chromosome 5**

21 **between W8 and 9930. a-c, Alignments of three assembled contigs of W8 harboring inversion**

22 **breakpoints, tig00000248.pilon (a), tig00005107.pilon (b) and tig00005107.pilon (c) (x-axis) to**

23 **chromosome 5 of 9930 (y-axis). Black arrows denote the positions of breakpoints.**

24

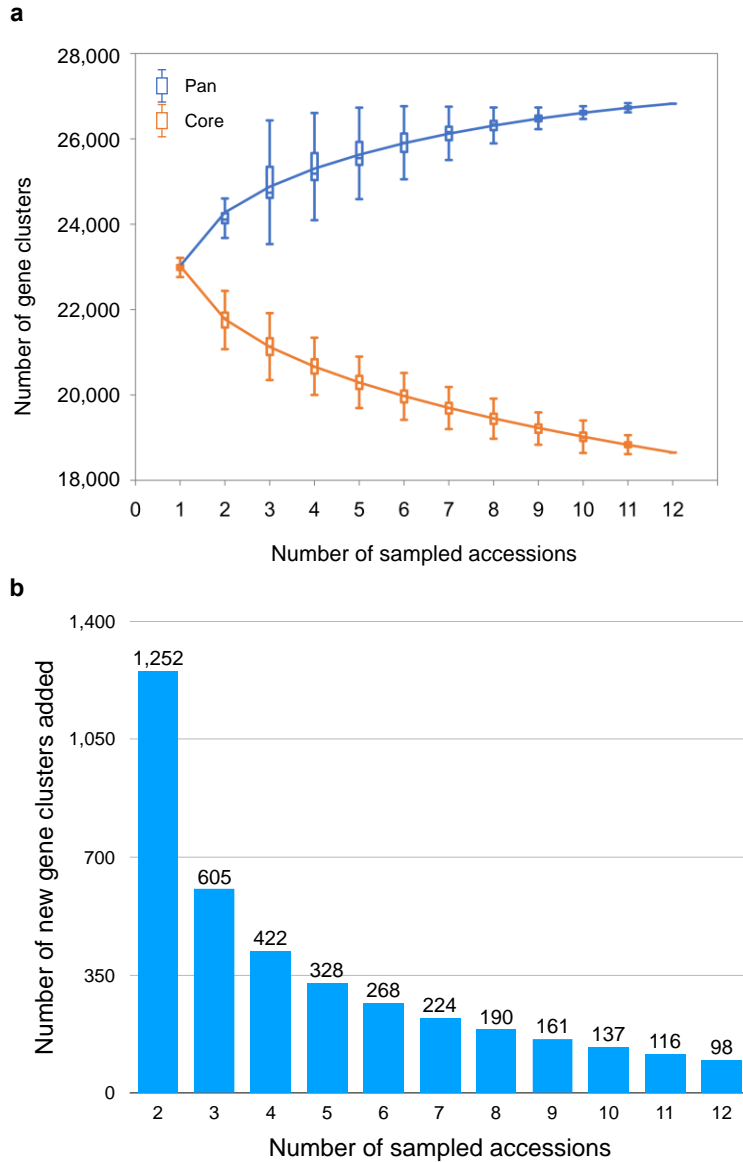

25

26 **Supplementary Fig. 5. Simulation of pan-genome and core genome sizes and newly added**  
 27 **gene clusters. a**, Pan-genome and core genome size simulation in terms of the number of gene  
 28 clusters. The median and upper and lower quartiles of gene cluster numbers are shown in boxplots.  
 29 The whiskers extend to the minimum and maximum of the data. The pan- and core-genome curves  
 30 were fitted using nonlinear models recommended by Tettelin *et al.*<sup>2</sup>. Simulation of pan-genome  
 31 size in terms of the number of protein-coding genes was performed with PanGP<sup>3</sup> using the totally  
 32 random algorithm with the number of combinations at each given number of genomes set to 500  
 33 and the sample replication time set to 20. **b**, Number of newly added gene clusters when including  
 34 more accessions. Source data are provided as a Source Data file.

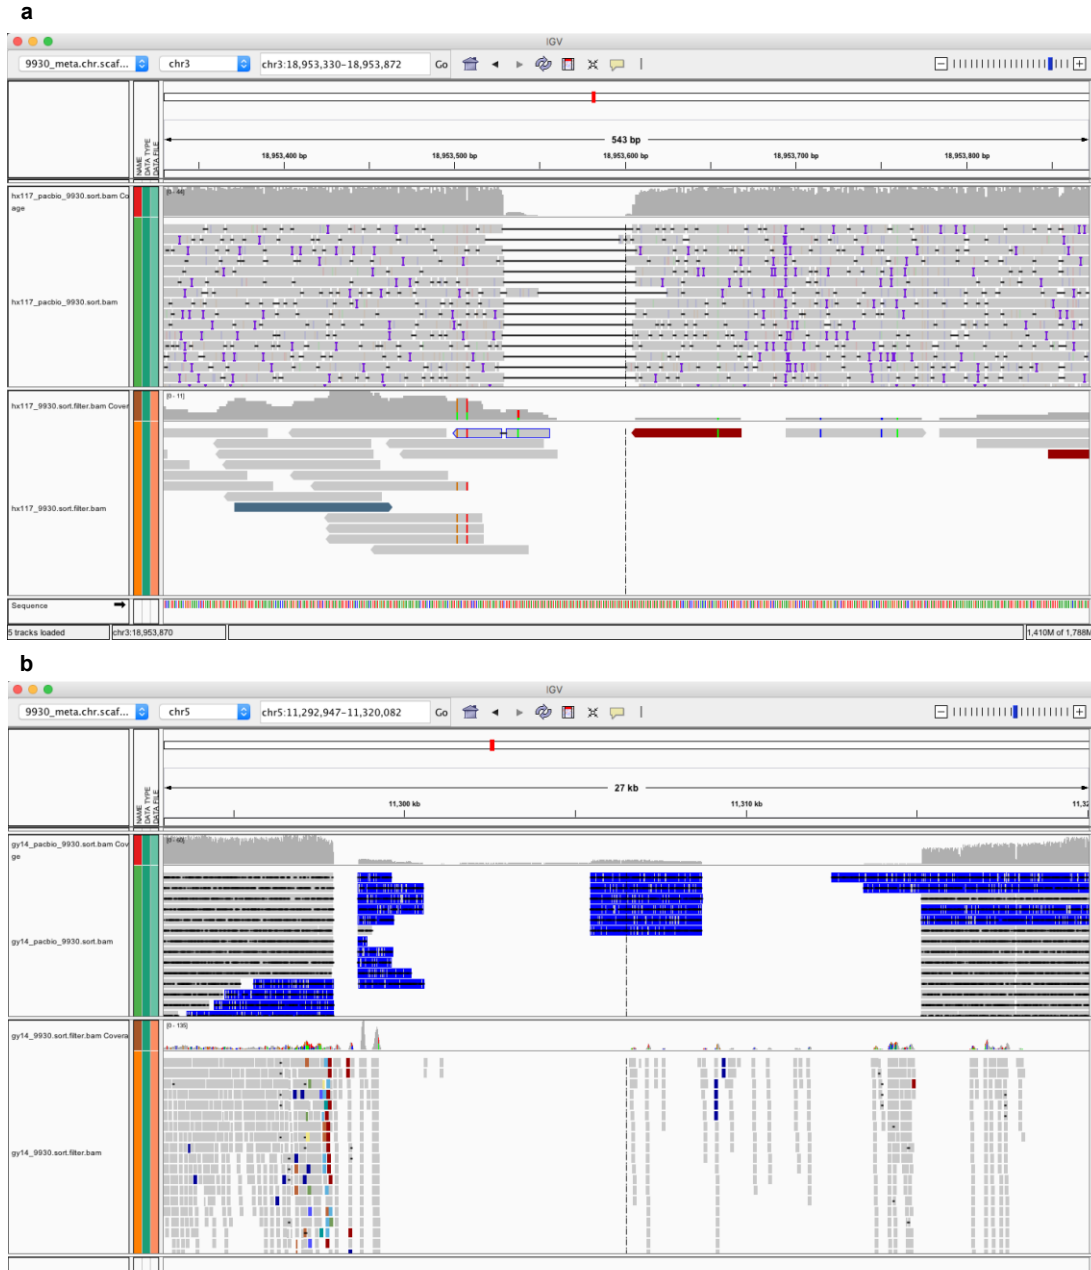

35  
 36 **Supplementary Fig. 6. Examples of SVs identified using long reads but not short reads. a, A**  
 37 **77-bp deletion in Hx117. b, A 13,852-bp deletion in Gy14.** Mapping of PacBio and Illumina reads  
 38 to the 9930 genome are shown in upper and lower panels, respectively. These two variants were  
 39 not identified using short reads probably due to the poor mapping around the breakpoints.

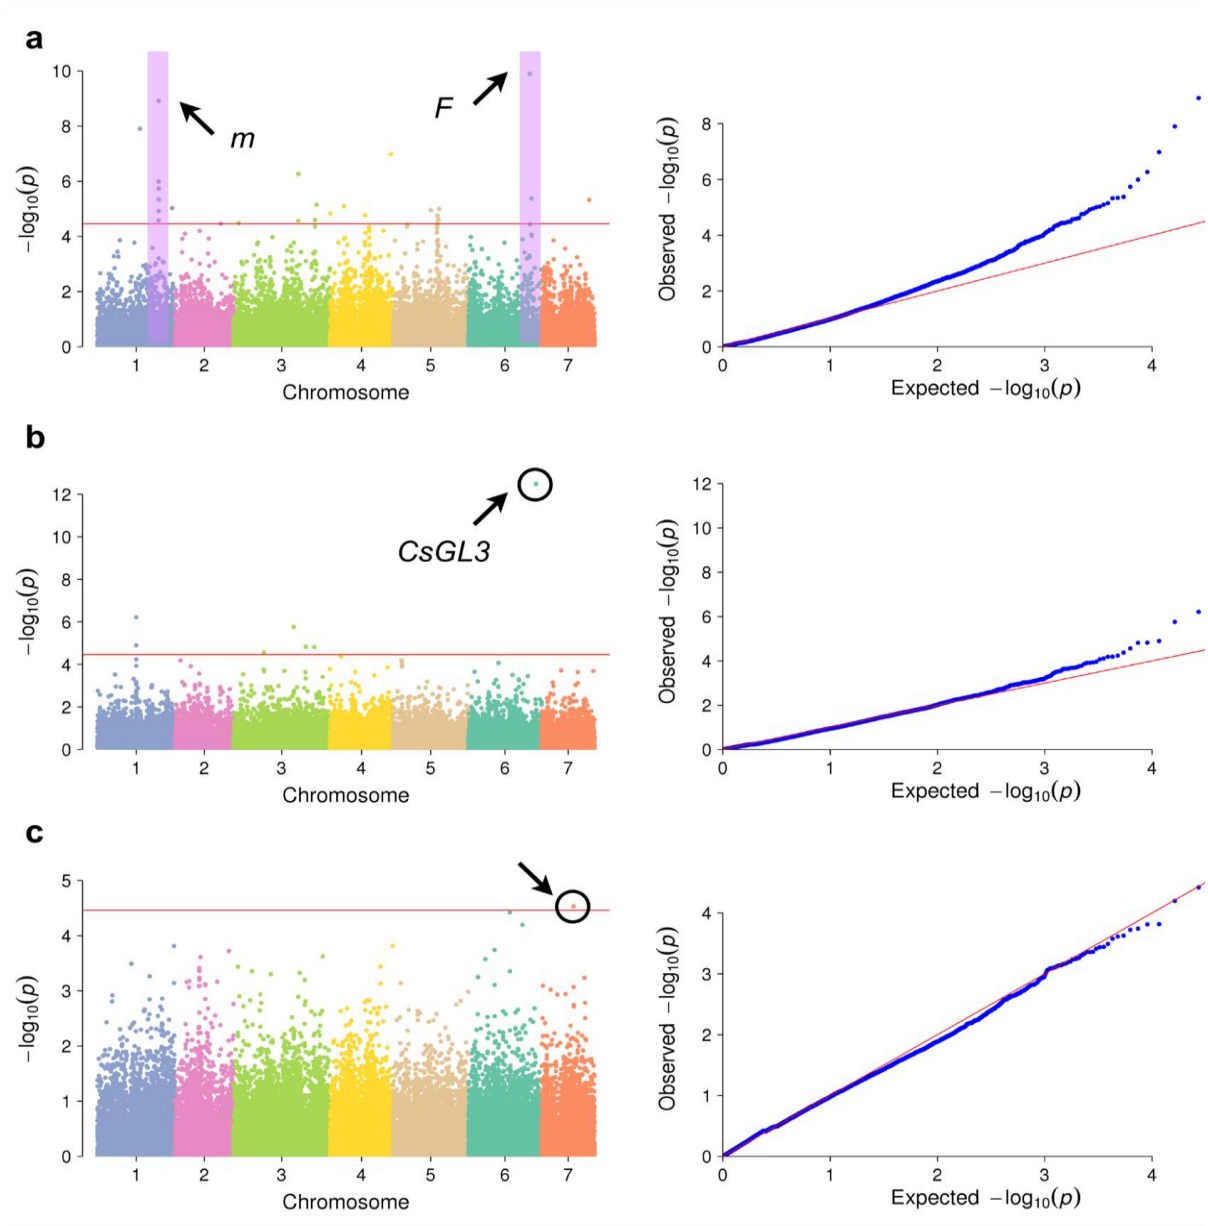

40

41 **Supplementary Fig. 7. Manhattan and quantile-quantile (QQ) plots of SV-based GWAS of**

42 **female flower rate on primary branch (a), fruit spine/wart density (b) and branch number**

43 **(c). The expected  $p$  values in the QQ plots comply with a uniform distribution.**

44



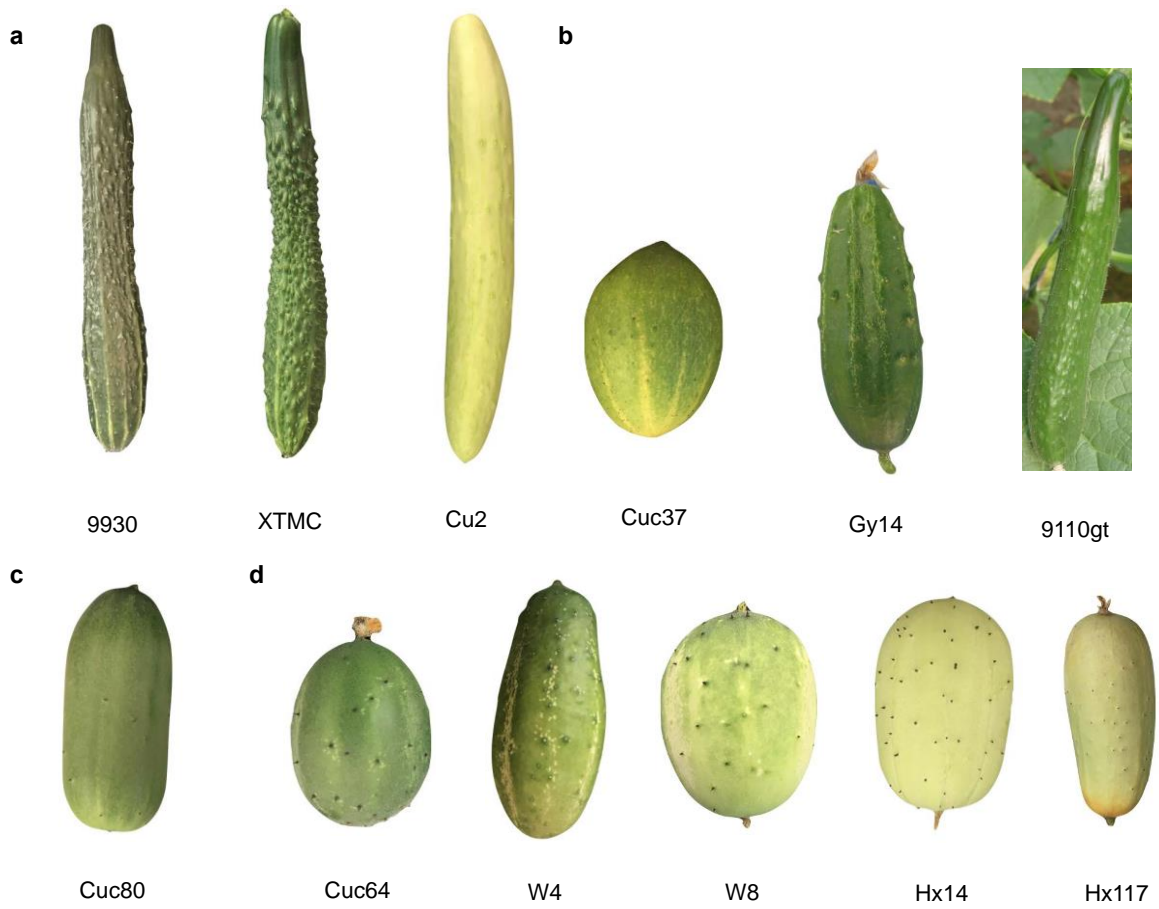

45  
 46  
 47  
 48  
 49

**Supplementary Fig. 8. Morphological diversity of cucumber fruit spines and warts among the 12 accessions used in this study. a, Accessions from East-Asian. b, Accessions from Eurasian. c, Accession from Xishuangbanna. d, Accessions from Indian.**

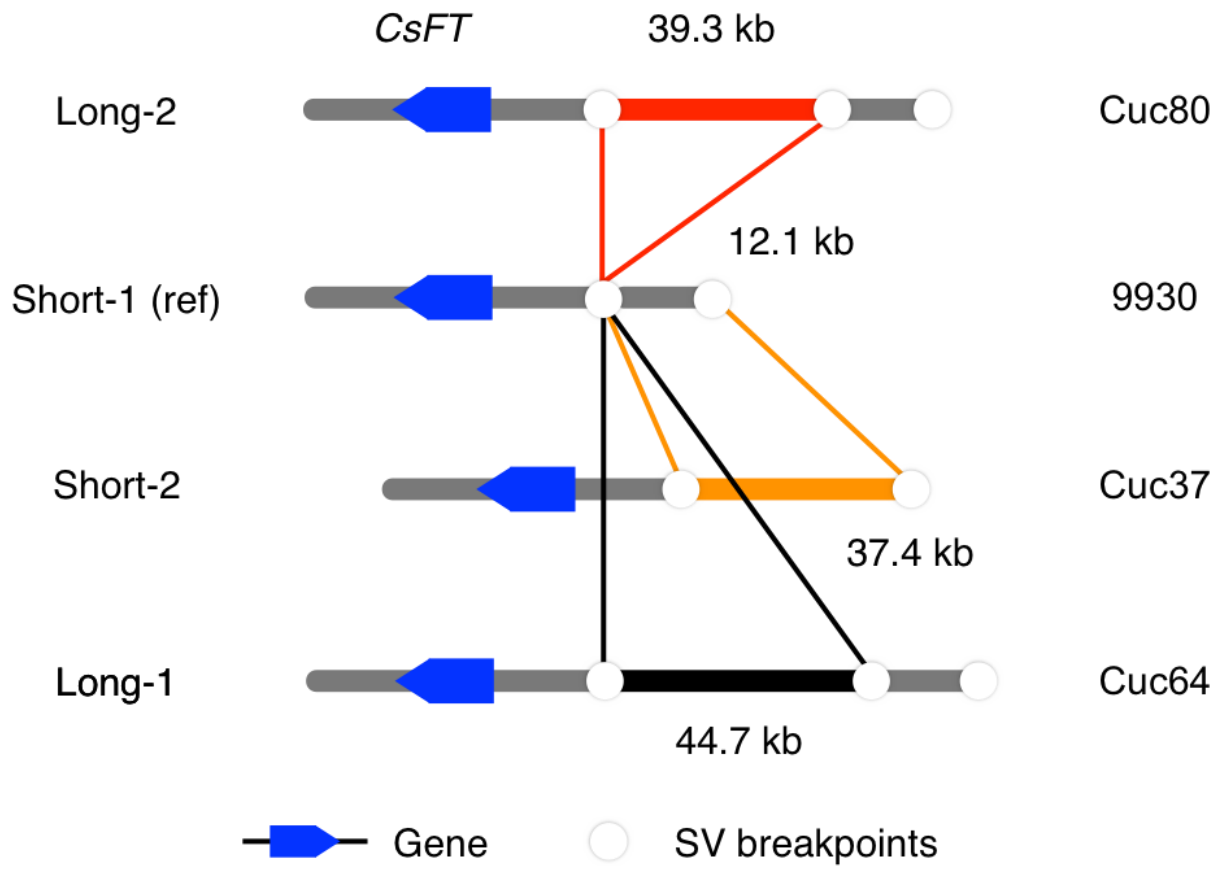

50

51 **Supplementary Fig. 9. Schematic illustration of alignments of the four types of *CsFT***  
 52 **upstream regions.**

53

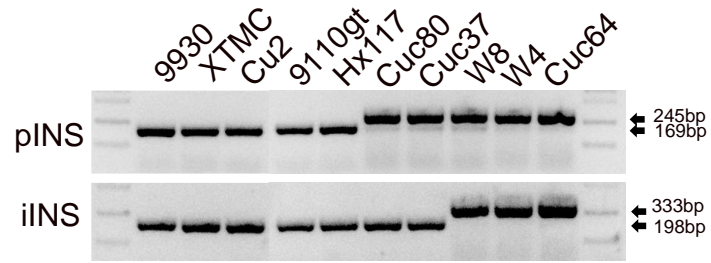

54

55 **Supplementary Fig. 10. PCR validation of pINS and iINS in 10 accessions.** Each experiment

56 is performed once. Source data are provided as a Source Data file.

57

**a**

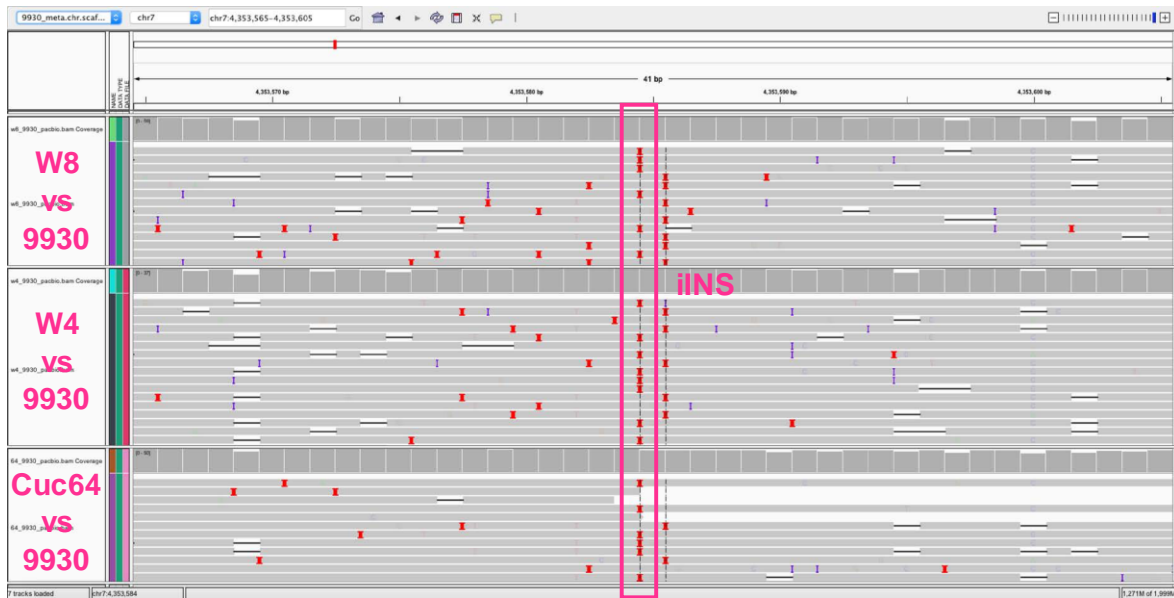

**b**

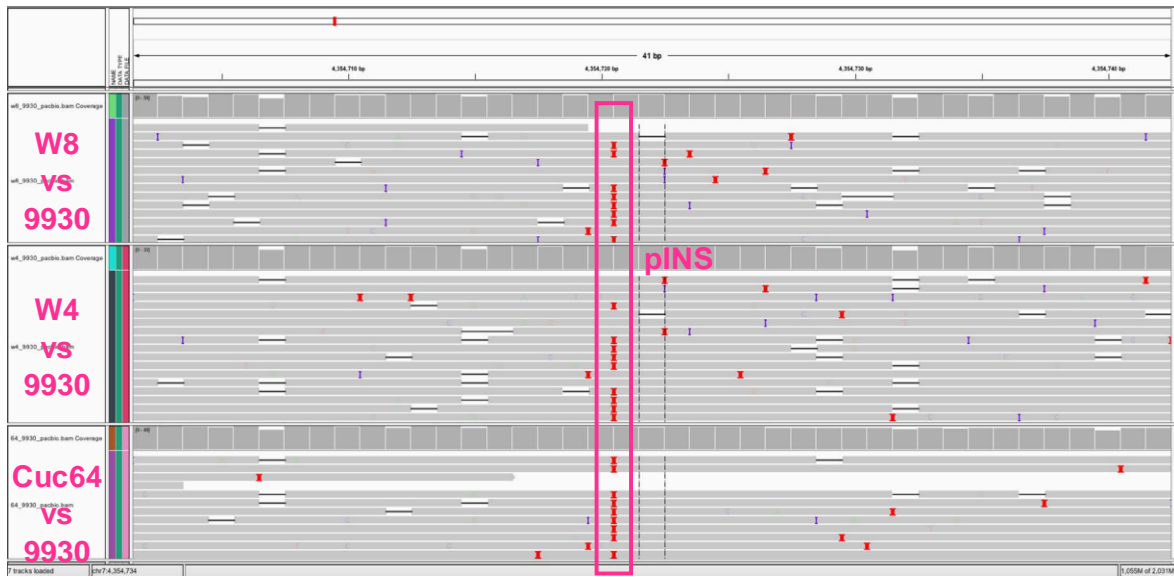

58

59 **Supplementary Fig. 11. PacBio read mapping supports iINS and pINS. a,** Long-read mapping  
60 of iINS flanking region. **b,** Long-read mapping of pINS flanking region. The 9930 genome was  
61 used as the reference for mapping.

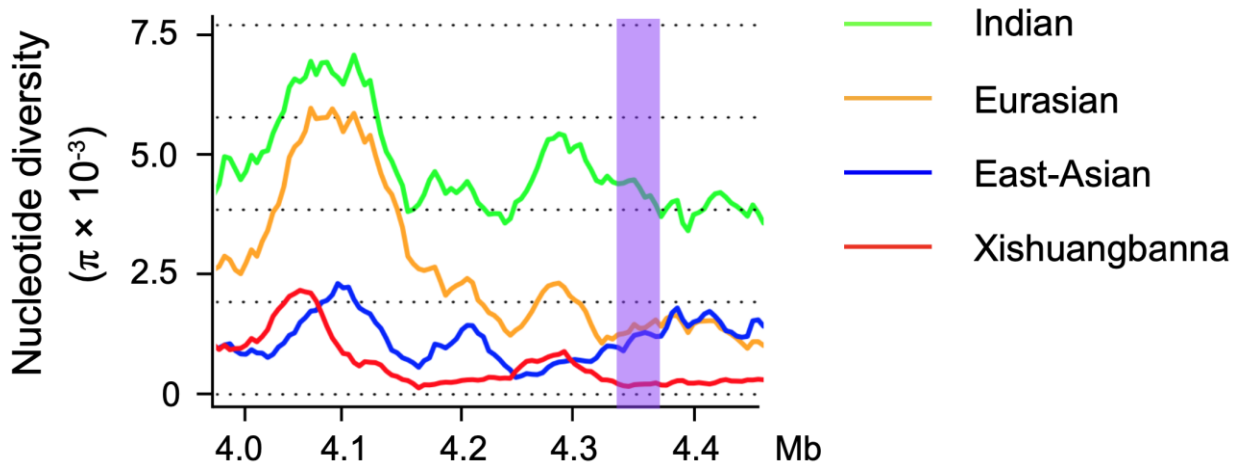

62

63 **Supplementary Fig. 12. Nucleotide diversity ( $\pi$ ) in the *PELPK7.1* and *PELPK7.2* genome**

64 **region (marked by purple bar).  $\pi$  was calculated based on 100-kb windows.**

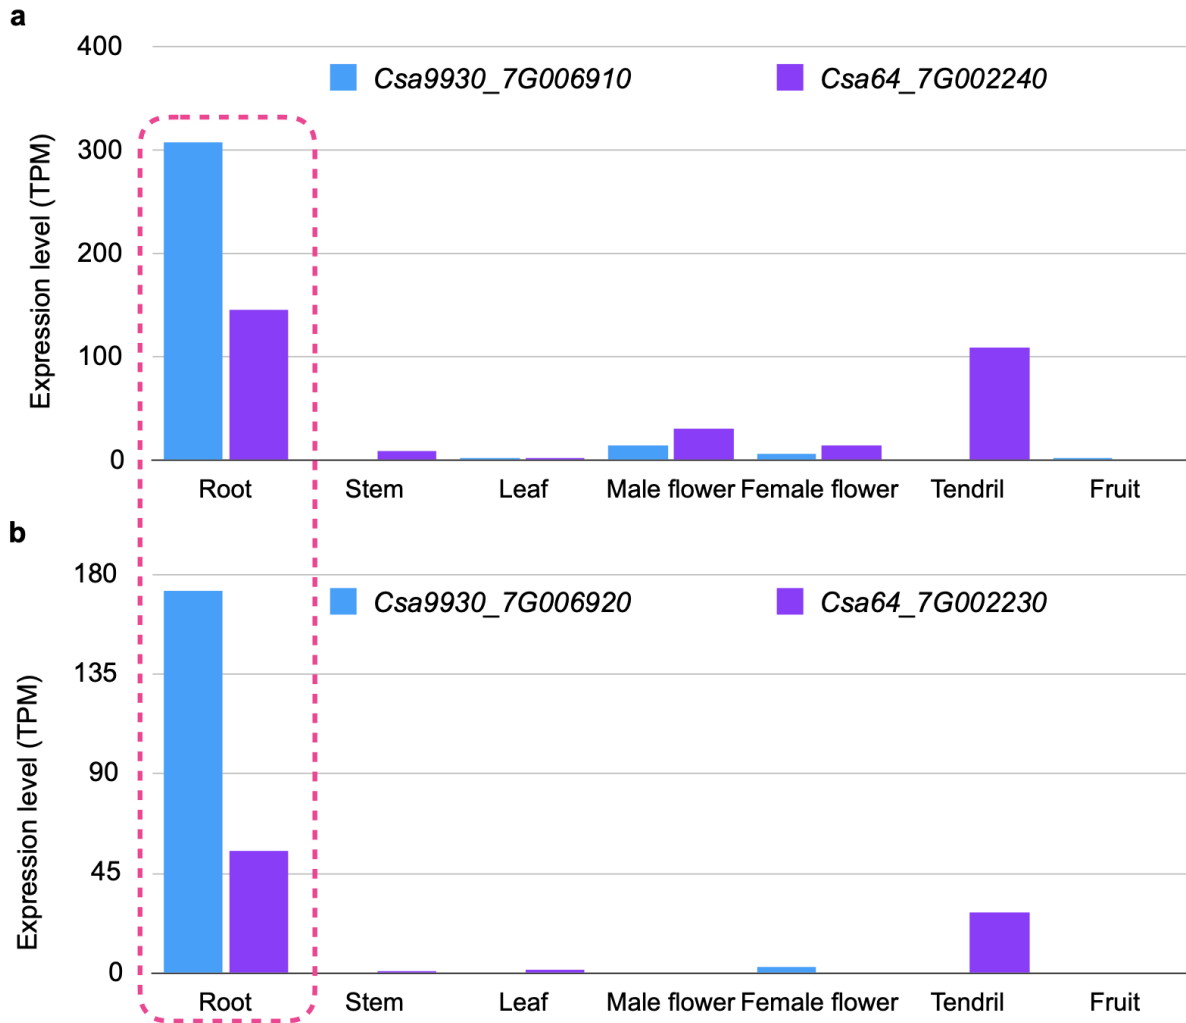

65

66 **Supplementary Fig. 13. Expression levels of *PELPK7.1* and *PELPK7.2* in cultivated**

67 **cucumber 9930 and wild cucumber Cuc64. a, Expression of *PELPK7.1* (*Csa9930\_7G006910***

68 **in 9930 and *Csa64\_7G002240* in Cuc64) in seven different tissues. b, Expression of *PELPK7.2***

69 **(*Csa9930\_7G006920* in 9930 and *Csa64\_7G002230* in Cuc64) in seven different tissues. TPM,**

70 **transcripts per million. Source data are provided as a Source Data file.**

71

72 **Supplementary Table 1. Modified Rogers distance (*MR*), Cavalli-Sforza and Edwards**  
73 **distance (*CE*), Shannon’s diversity index (*SH*) and genetic coverage value (*CV*) of the 12**  
74 **accessions and the cucumber core collection of 115 lines.** Twenty independent runs were  
75 performed, each with 10,000 randomly selected SNPs.

76

| <b>Run</b> | <b><i>MR</i> (12)</b> | <b><i>MR</i> (115)</b> | <b><i>CE</i> (12)</b> | <b><i>CE</i> (115)</b> | <b><i>SH</i> (12)</b> | <b><i>SH</i> (115)</b> | <b><i>CV</i>*</b> |
|------------|-----------------------|------------------------|-----------------------|------------------------|-----------------------|------------------------|-------------------|
| 1          | 0.497                 | 0.380                  | 0.500                 | 0.385                  | 9.446                 | 9.512                  | 83.44%            |
| 2          | 0.496                 | 0.378                  | 0.499                 | 0.382                  | 9.446                 | 9.510                  | 83.72%            |
| 3          | 0.492                 | 0.377                  | 0.496                 | 0.381                  | 9.444                 | 9.510                  | 83.71%            |
| 4          | 0.497                 | 0.378                  | 0.500                 | 0.383                  | 9.442                 | 9.511                  | 83.63%            |
| 5          | 0.495                 | 0.379                  | 0.498                 | 0.384                  | 9.446                 | 9.513                  | 83.47%            |
| 6          | 0.498                 | 0.380                  | 0.502                 | 0.384                  | 9.449                 | 9.513                  | 83.45%            |
| 7          | 0.496                 | 0.376                  | 0.499                 | 0.381                  | 9.431                 | 9.508                  | 83.72%            |
| 8          | 0.495                 | 0.377                  | 0.498                 | 0.382                  | 9.438                 | 9.511                  | 83.78%            |
| 9          | 0.498                 | 0.380                  | 0.501                 | 0.385                  | 9.450                 | 9.513                  | 83.36%            |
| 10         | 0.495                 | 0.377                  | 0.499                 | 0.382                  | 9.440                 | 9.510                  | 83.68%            |
| 11         | 0.494                 | 0.378                  | 0.498                 | 0.382                  | 9.445                 | 9.511                  | 83.80%            |
| 12         | 0.496                 | 0.378                  | 0.499                 | 0.383                  | 9.439                 | 9.510                  | 83.50%            |
| 13         | 0.495                 | 0.378                  | 0.498                 | 0.383                  | 9.441                 | 9.511                  | 83.62%            |
| 14         | 0.493                 | 0.375                  | 0.496                 | 0.379                  | 9.444                 | 9.507                  | 83.65%            |
| 15         | 0.495                 | 0.377                  | 0.499                 | 0.381                  | 9.442                 | 9.510                  | 83.79%            |
| 16         | 0.494                 | 0.374                  | 0.497                 | 0.379                  | 9.434                 | 9.508                  | 83.46%            |
| 17         | 0.496                 | 0.377                  | 0.499                 | 0.381                  | 9.436                 | 9.509                  | 83.64%            |
| 18         | 0.495                 | 0.377                  | 0.499                 | 0.381                  | 9.439                 | 9.509                  | 83.74%            |
| 19         | 0.492                 | 0.374                  | 0.496                 | 0.379                  | 9.439                 | 9.506                  | 83.89%            |
| 20         | 0.495                 | 0.377                  | 0.498                 | 0.382                  | 9.442                 | 9.510                  | 83.63%            |

77 \**CV* represents the proportion of the genetic diversity of the 115-line collection captured by the 12 cucumber  
78 accessions

79 **Supplementary Table 2. Summary of PacBio sequencing data.**

80

| <b>Accession</b> | <b>Total bases</b> | <b>No. of reads</b> | <b>N50 read length (bp)</b> | <b>Mean read length (bp)</b> |
|------------------|--------------------|---------------------|-----------------------------|------------------------------|
| XTMC             | 18,411,253,399     | 1,467,719           | 19,822                      | 12,544                       |
| Cu2              | 22,448,870,253     | 2,099,019           | 17,248                      | 10,695                       |
| Cuc37            | 18,898,479,934     | 2,297,733           | 12,471                      | 8,225                        |
| Gy14             | 16,541,226,126     | 1,229,870           | 20,797                      | 13,450                       |
| 9110gt           | 20,286,874,980     | 2,096,506           | 15,709                      | 9,677                        |
| Cuc80            | 16,547,985,677     | 1,744,625           | 13,264                      | 9,485                        |
| Cuc64            | 15,945,257,333     | 1,913,418           | 12,874                      | 8,333                        |
| W4               | 20,249,173,103     | 1,888,850           | 17,282                      | 10,720                       |
| W8               | 19,532,540,352     | 1,986,554           | 16,284                      | 9,832                        |
| Hx14             | 18,354,892,791     | 1,479,661           | 19,120                      | 12,405                       |
| Hx117            | 17,272,792,707     | 1,532,235           | 18,037                      | 11,273                       |

81



82 **Supplementary Table 3. Summary of Illumina resequencing data used in this study.**

83

| <b>Accession</b> | <b>Total bases</b> | <b>No. of reads</b> | <b>Read length (bp)</b> |
|------------------|--------------------|---------------------|-------------------------|
| XTMC             | 5,538,174,000      | 55,381,740          | 100                     |
| Cu2              | 5,708,862,300      | 38,059,082          | 150                     |
| Cuc37            | 3,735,863,280      | 41,509,592          | 90                      |
| Gy14             | 5,816,384,400      | 58,163,844          | 100                     |
| 9110gt           | 4,904,735,000      | 49,047,350          | 100                     |
| Cuc80            | 5,537,630,520      | 61,529,228          | 90                      |
| Cuc64            | 4,330,595,850      | 57,741,278          | 75                      |
| W4               | 5,525,343,900      | 61,392,710          | 90                      |
| W8               | 5,519,869,380      | 61,331,882          | 90                      |
| Hx14             | 5,205,132,900      | 57,834,810          | 90                      |
| Hx117            | 4,583,354,220      | 50,926,158          | 90                      |

84

85 **Supplementary Table 4. Summary of 10X Genomics sequencing data.**

86

| <b>Accession</b> | <b>Total bases</b> | <b>No. of reads</b> | <b>Read length (bp)</b> |
|------------------|--------------------|---------------------|-------------------------|
| Cuc37            | 28,939,107,000     | 192,927,380         | 150                     |
| Cuc80            | 21,762,913,200     | 145,086,088         | 150                     |
| Cuc64            | 29,007,008,400     | 193,380,056         | 150                     |

87

88 **Supplementary Table 5. Summary of Hi-C sequencing data.**

89

| <b>Accession</b> | <b>Repeat</b> | <b>Total bases</b> | <b>No. of reads</b> | <b>Read length (bp)</b> |
|------------------|---------------|--------------------|---------------------|-------------------------|
| Cuc37            | Repeat 1      | 35,597,584,800     | 237,317,232         | 150                     |
|                  | Repeat 2      | 32,818,537,800     | 218,790,252         | 150                     |
| Cuc80            | Repeat 1      | 34,049,121,900     | 226,994,146         | 150                     |
|                  | Repeat 2      | 32,916,737,700     | 219,444,918         | 150                     |
| Cuc64            | Repeat 1      | 36,401,990,700     | 242,679,938         | 150                     |
|                  | Repeat 2      | 39,268,682,400     | 261,791,216         | 150                     |

90

91 **Supplementary Table 6. Genome assembly statistics of the 11 cucumber accessions.**

92

|                              | <b>XTMC</b> | <b>Cu2</b> | <b>Cuc37</b> | <b>Gy14</b> | <b>9110gt</b> | <b>Cuc80</b> | <b>Cuc64</b> | <b>W4</b> | <b>W8</b> | <b>Hx14</b> | <b>Hx117</b> |
|------------------------------|-------------|------------|--------------|-------------|---------------|--------------|--------------|-----------|-----------|-------------|--------------|
| Assembly length (Mb)         | 240.0       | 247.1      | 238.4        | 239.4       | 242.9         | 237.4        | 232.5        | 251.1     | 241.9     | 234.6       | 243.7        |
| No. of contigs               | 926         | 851        | 967          | 926         | 830           | 923          | 842          | 894       | 907       | 865         | 1,015        |
| Contig N50 <sup>#</sup> (Mb) | 2.1         | 5.3        | 3.8          | 2.1         | 3.9           | 4.3          | 4.4          | 4.7       | 4.3       | 1.7         | 2.1          |
| Longest contig (Mb)          | 7.7         | 13.3       | 18.8         | 11.2        | 14.0          | 10.1         | 13.5         | 15.5      | 18.1      | 6.8         | 14.0         |
| No. of scaffolds             | /           | /          | 865          | /           | /             | 887          | 796          | /         | /         | /           | /            |
| Scaffold N50 (Mb)            | /           | /          | 7.9          | /           | /             | 7.3          | 7.9          | /         | /         | /           | /            |
| Longest scaffold (Mb)        | /           | /          | 18.8         | /           | /             | 18.0         | 16.3         | /         | /         | /           | /            |
| No. of super-scaffolds       | /           | /          | 238          | /           | /             | 290          | 496          | /         | /         | /           | /            |
| Super-scaffold N50 (Mb)      | /           | /          | 33.7         | /           | /             | 33.3         | 31.0         | /         | /         | /           | /            |
| Longest super-scaffold (Mb)  | /           | /          | 43.8         | /           | /             | 41.2         | 41.9         | /         | /         | /           | /            |

93 <sup>#</sup>N50 refers to the size above which half of the total length of the sequence set can be found

94

95 **Supplementary Table 7. Summary of annotated transposable elements in the 12 cucumber**  
 96 **genomes.**  
 97

|        | <b>SINEs</b>    | <b>LINEs</b>     | <b>LTR elements</b> | <b>DNA elements</b> | <b>Unclassified</b> |
|--------|-----------------|------------------|---------------------|---------------------|---------------------|
|        | <b>(bp / %)</b> | <b>(bp / %)</b>  | <b>(bp / %)</b>     | <b>(bp / %)</b>     | <b>(bp / %)</b>     |
| 9930   | 0 / 0.00        | 3,597,475 / 1.59 | 32,258,069 / 14.26  | 3,375,240 / 1.49    | 34,178,558 / 15.11  |
| XTMC   | 0 / 0.00        | 5,071,294 / 2.11 | 40,412,410 / 16.83  | 3,471,461 / 1.45    | 40,399,646 / 16.82  |
| Cu2    | 0 / 0.00        | 5,294,324 / 2.14 | 42,005,126 / 17.00  | 3,514,788 / 1.42    | 42,359,428 / 17.14  |
| Cuc37  | 0 / 0.00        | 4,482,047 / 1.88 | 42,836,751 / 17.97  | 3,065,727 / 1.29    | 38,307,665 / 16.07  |
| Gy14   | 313,205 / 0.13  | 7,223,114 / 3.02 | 41,003,657 / 17.13  | 8,208,611 / 3.43    | 27,501,561 / 11.49  |
| 9110gt | 5,927 / 0.00    | 5,887,444 / 2.42 | 46,834,203 / 19.28  | 3,676,953 / 1.51    | 37,208,350 / 15.32  |
| Cuc80  | 7,434 / 0.00    | 4,387,181 / 1.85 | 43,095,625 / 18.15  | 3,006,786 / 1.27    | 35,150,012 / 14.80  |
| Cuc64  | 0 / 0.00        | 5,260,869 / 2.26 | 40,131,219 / 17.26  | 2,931,443 / 1.26    | 33,944,605 / 14.61  |
| W4     | 0 / 0.00        | 3,711,032 / 1.48 | 48,401,617 / 19.28  | 3,478,371 / 1.39    | 39,907,171 / 15.89  |
| W8     | 0 / 0.00        | 4,702,762 / 1.94 | 41,481,736 / 17.15  | 3,344,878 / 1.38    | 39,255,675 / 16.23  |
| Hx14   | 0 / 0.00        | 4,309,772 / 1.84 | 38,772,670 / 16.53  | 2,815,615 / 1.20    | 39,374,747 / 16.79  |
| HX117  | 0 / 0.00        | 4,805,179 / 1.97 | 40,900,204 / 16.78  | 3,442,478 / 1.41    | 39,457,439 / 16.19  |

98

99 **Supplementary Table 8. Summary of identified LTR-RTs in the 12 cucumber genomes.**  
 100

| <b>Accession</b> | <b>No. of intact<br/>LTR-RTs</b> | <b>Length of <i>Copia</i><br/>LTR-RTs (bp)</b> | <b>Length of <i>Gypsy</i><br/>LTR-RTs (bp)</b> | <b>Length of Unknown<br/>LTR-RTs (bp)</b> | <b>Total length<br/>(bp)</b> |
|------------------|----------------------------------|------------------------------------------------|------------------------------------------------|-------------------------------------------|------------------------------|
| 9930             | 324                              | 7,039,013                                      | 15,978,958                                     | 9,240,098                                 | 32,258,069                   |
| XTMC             | 473                              | 10,363,287                                     | 18,090,814                                     | 11,958,309                                | 40,412,410                   |
| Cu2              | 468                              | 6,303,924                                      | 23,519,221                                     | 12,181,981                                | 42,005,126                   |
| Cuc37            | 497                              | 6,546,061                                      | 18,252,751                                     | 18,037,939                                | 42,836,751                   |
| Gy14             | 438                              | 7,704,608                                      | 17,094,549                                     | 16,204,500                                | 41,003,657                   |
| 9110gt           | 531                              | 11,914,750                                     | 19,548,266                                     | 15,371,187                                | 46,834,203                   |
| Cuc80            | 462                              | 5,132,925                                      | 19,108,484                                     | 18,854,216                                | 43,095,625                   |
| Cuc64            | 440                              | 7,268,350                                      | 18,101,476                                     | 14,761,393                                | 40,131,219                   |
| W4               | 437                              | 8,183,991                                      | 23,023,837                                     | 17,193,789                                | 48,401,617                   |
| W8               | 443                              | 6,425,991                                      | 19,193,227                                     | 15,862,518                                | 41,481,736                   |
| Hx14             | 348                              | 7,751,599                                      | 18,816,970                                     | 12,204,101                                | 38,772,670                   |
| HX117            | 456                              | 7,629,266                                      | 20,355,692                                     | 12,915,246                                | 40,900,204                   |

101

102 **Supplementary Table 9. Statistics of predicted protein-coding genes in the 11 cucumber**  
 103 **genomes.**  
 104

|        | <b>No. of<br/>predicted<br/>genes</b> | <b>Average gene<br/>length (bp)</b> | <b>Average CDS<br/>length (bp)</b> | <b>No. of<br/>exons<br/>per gene</b> | <b>Average<br/>intergenic space<br/>distance (bp)</b> | <b>Average<br/>intron<br/>length (bp)</b> |
|--------|---------------------------------------|-------------------------------------|------------------------------------|--------------------------------------|-------------------------------------------------------|-------------------------------------------|
| XTMC   | 25,167                                | 3,182                               | 1,091                              | 5                                    | 5,672                                                 | 539                                       |
| Cu2    | 25,382                                | 3,244                               | 1,109                              | 5                                    | 5,747                                                 | 546                                       |
| Cuc37  | 24,490                                | 3,302                               | 1,122                              | 5                                    | 6,306                                                 | 547                                       |
| Gy14   | 25,042                                | 3,182                               | 1,091                              | 5                                    | 5,580                                                 | 535                                       |
| 9110gt | 24,992                                | 3,256                               | 1,099                              | 5                                    | 5,663                                                 | 549                                       |
| Cuc80  | 24,578                                | 3,285                               | 1,123                              | 5                                    | 6,225                                                 | 540                                       |
| Cuc64  | 24,583                                | 3,276                               | 1,124                              | 5                                    | 5,838                                                 | 539                                       |
| W4     | 25,703                                | 3,270                               | 1,099                              | 5                                    | 5,769                                                 | 554                                       |
| W8     | 25,531                                | 3,243                               | 1,095                              | 5                                    | 5,538                                                 | 548                                       |
| Hx14   | 24,914                                | 3,234                               | 1,103                              | 5                                    | 5,598                                                 | 544                                       |
| Hx117  | 26,033                                | 3,199                               | 1,075                              | 5                                    | 5,656                                                 | 546                                       |

105

106 **Supplementary Table 10. Summary of the seven chromosomal rearrangements between**  
 107 **Cuc64 and 9930.**  
 108

| <b>Inversion</b> | <b>Cuc64</b> |                   |              | <b>9930</b> |                   |              |
|------------------|--------------|-------------------|--------------|-------------|-------------------|--------------|
|                  | <b>name</b>  | <b>Chromosome</b> | <b>Start</b> | <b>End</b>  | <b>Chromosome</b> | <b>Start</b> |
| INV4.1           | chr4         | 1                 | 10,745,877   | chr4        | 1                 | 10,690,618   |
| INV4.2           | chr4         | 17,883,271        | 19,208,399   | chr4        | 18,639,193        | 19,916,753   |
| INV4.3           | chr4         | 19,228,227        | 25,957,224   | chr4        | 19,952,352        | 26,585,698   |
| INV5.1           | chr5         | 1                 | 4,125,964    | chr5        | 1                 | 4,090,476    |
| INV5.2           | chr5         | 4,132,900         | 13,356,663   | chr5        | 4,090,473         | 14,380,594   |
| INV5.3           | chr5         | 13,369,466        | 21,637,222   | chr5        | 13,545,813        | 22,905,740   |
| INV7.1           | chr7         | 1                 | 6,020,425    | chr7        | 1                 | 5,852,708    |

109



110 **Supplementary Table 11. Non-redundant cucumber pan-genome based on protein-coding**  
 111 **genes.**  
 112

| <b>Accession</b> | <b>No. of core genes</b> | <b>No. of dispensable genes</b> | <b>No. of total genes (used for clustering)</b> | <b>Core/pan ratio (%)</b> |
|------------------|--------------------------|---------------------------------|-------------------------------------------------|---------------------------|
| 9930             | 19,833                   | 4,436                           | 24,269                                          | 81.72                     |
| XTMC             | 20,132                   | 4,557                           | 24,689                                          | 81.54                     |
| Cu2              | 20,239                   | 4,598                           | 24,837                                          | 81.49                     |
| Cuc37            | 19,917                   | 4,151                           | 24,068                                          | 82.75                     |
| Gy14             | 20,202                   | 4,450                           | 24,652                                          | 81.95                     |
| 9110gt           | 20,087                   | 4,489                           | 24,576                                          | 81.73                     |
| Cuc80            | 19,950                   | 4,127                           | 24,077                                          | 82.86                     |
| Cuc64            | 20,018                   | 4,122                           | 24,140                                          | 82.92                     |
| W4               | 20,576                   | 4,557                           | 25,133                                          | 81.87                     |
| W8               | 20,601                   | 4,510                           | 25,111                                          | 82.04                     |
| Hx14             | 20,012                   | 4,458                           | 24,470                                          | 81.78                     |
| Hx117            | 20,862                   | 4,692                           | 25,554                                          | 81.64                     |
| Pan-genome       | 18,651                   | 8,171                           | 26,822                                          | 69.54                     |

113

114 **Supplementary Table 12. Top 15 gene ontology (GO) biological process terms enriched in the**  
 115 **core genes.**  
 116

| <b>GO ID</b> | <b>Description</b>                                              | <b>Frequency in core<br/>genes</b> | <b>Frequency in pan<br/>genes</b> | <b>FDR</b> |
|--------------|-----------------------------------------------------------------|------------------------------------|-----------------------------------|------------|
| GO:0009987   | cellular process                                                | 4498/7,206 (62.42%)                | 5058/8,265 (61.2%)                | 2.20E-07   |
| GO:0043412   | macromolecule modification                                      | 1168/7,206 (16.21%)                | 1276/8,265 (15.44%)               | 4.15E-06   |
| GO:0006464   | cellular protein modification<br>process                        | 1105/7,206 (15.33%)                | 1209/8,265 (14.63%)               | 1.20E-05   |
| GO:0036211   | protein modification process                                    | 1105/7,206 (15.33%)                | 1209/8,265 (14.63%)               | 1.20E-05   |
| GO:0044237   | cellular metabolic process                                      | 3730/7,206 (51.76%)                | 4202/8,265 (50.84%)               | 1.42E-04   |
| GO:0070085   | glycosylation                                                   | 77/7,206 (1.07%)                   | 77/8,265 (0.93%)                  | 4.17E-04   |
| GO:0006486   | protein glycosylation                                           | 72/7,206 (1%)                      | 72/8,265 (0.87%)                  | 4.90E-04   |
| GO:0009100   | glycoprotein metabolic process                                  | 72/7,206 (1%)                      | 72/8,265 (0.87%)                  | 4.90E-04   |
| GO:0009101   | glycoprotein biosynthetic process                               | 72/7,206 (1%)                      | 72/8,265 (0.87%)                  | 4.90E-04   |
| GO:0043413   | macromolecule glycosylation                                     | 72/7,206 (1%)                      | 72/8,265 (0.87%)                  | 4.90E-04   |
| GO:0006793   | phosphorus metabolic process                                    | 1098/7,206 (15.24%)                | 1214/8,265 (14.69%)               | 8.27E-04   |
| GO:0006796   | phosphate-containing compound<br>metabolic process              | 1091/7,206 (15.14%)                | 1207/8,265 (14.6%)                | 1.00E-03   |
| GO:0044763   | single-organism cellular process                                | 1501/7,206 (20.83%)                | 1672/8,265 (20.23%)               | 1.31E-03   |
| GO:0009058   | biosynthetic process                                            | 1883/7,206 (26.13%)                | 2107/8,265 (25.49%)               | 1.71E-03   |
| GO:0070647   | protein modification by small<br>protein conjugation or removal | 118/7,206 (1.64%)                  | 122/8,265 (1.48%)                 | 1.73E-03   |

117

118 **Supplementary Table 13. Top 15 gene ontology (GO) biological process terms enriched in the**  
 119 **dispensable genes.**

120

| <b>GO ID</b> | <b>Description</b>               | <b>Frequency in<br/>dispensable genes</b> | <b>Frequency in pan<br/>genes</b> | <b>FDR</b> |
|--------------|----------------------------------|-------------------------------------------|-----------------------------------|------------|
| GO:0015074   | DNA integration                  | 30/1,059 (2.83%)                          | 38/8,265 (0.46%)                  | 2.10E-18   |
| GO:0009733   | response to auxin                | 32/1,059 (3.02%)                          | 64/8,265 (0.77%)                  | 2.75E-11   |
| GO:0010033   | response to organic substance    | 34/1,059 (3.21%)                          | 105/8,265 (1.27%)                 | 3.20E-06   |
| GO:0009719   | response to endogenous stimulus  | 33/1,059 (3.12%)                          | 101/8,265 (1.22%)                 | 3.20E-06   |
| GO:0009725   | response to hormone              | 33/1,059 (3.12%)                          | 101/8,265 (1.22%)                 | 3.20E-06   |
| GO:0006259   | DNA metabolic process            | 61/1,059 (5.76%)                          | 254/8,265 (3.07%)                 | 8.67E-06   |
| GO:0042221   | response to chemical             | 42/1,059 (3.97%)                          | 163/8,265 (1.97%)                 | 6.86E-05   |
| GO:0000723   | telomere maintenance             | 9/1,059 (0.85%)                           | 14/8,265 (0.17%)                  | 9.90E-05   |
| GO:0032200   | telomere organization            | 9/1,059 (0.85%)                           | 14/8,265 (0.17%)                  | 9.90E-05   |
| GO:0060249   | anatomical structure homeostasis | 9/1,059 (0.85%)                           | 14/8,265 (0.17%)                  | 9.90E-05   |
| GO:0009611   | response to wounding             | 9/1,059 (0.85%)                           | 19/8,265 (0.23%)                  | 2.27E-03   |
| GO:0050896   | response to stimulus             | 136/1,059 (12.84%)                        | 822/8,265 (9.95%)                 | 5.33E-03   |
| GO:0000280   | nuclear division                 | 10/1,059 (0.94%)                          | 29/8,265 (0.35%)                  | 1.76E-02   |
| GO:0008283   | cell proliferation               | 5/1,059 (0.47%)                           | 9/8,265 (0.11%)                   | 1.97E-02   |
| GO:0007127   | meiosis I                        | 4/1,059 (0.38%)                           | 6/8,265 (0.07%)                   | 2.16E-02   |

121

122 **Supplementary Table 14. Summary of identified SNPs and small InDels.**

123

| <b>Accession</b> | <b>No. of SNPs</b> | <b>No. of InDels</b> | <b>Total length of InDels (bp)</b> | <b>Average length of InDels (bp)</b> |
|------------------|--------------------|----------------------|------------------------------------|--------------------------------------|
| XTMC             | 159,808            | 121,262              | 291,229                            | 2.4                                  |
| Cu2              | 298,628            | 132,407              | 472,752                            | 3.6                                  |
| Cuc37            | 531,202            | 210,330              | 779,692                            | 3.7                                  |
| Gy14             | 480,423            | 185,738              | 699,778                            | 3.8                                  |
| 9110gt           | 317,456            | 175,862              | 519,896                            | 3.0                                  |
| Cuc80            | 624,986            | 198,819              | 860,635                            | 4.3                                  |
| Cuc64            | 1,358,519          | 414,589              | 1,879,261                          | 4.5                                  |
| W4               | 793,213            | 276,587              | 1,145,344                          | 4.1                                  |
| W8               | 1,371,284          | 432,819              | 1,927,486                          | 4.5                                  |
| Hx14             | 701,739            | 269,252              | 1,022,211                          | 3.8                                  |
| Hx117            | 630,902            | 265,914              | 945,799                            | 3.6                                  |
| Total            | 2,902,954          | 1,388,197            | 5,649,184                          | 4.1                                  |

124

125 **Supplementary Table 15. Functional impact of identified SNPs.**

126

| <b>Accession</b> | <b>Intergenic</b> | <b>Intron</b> | <b>CDS</b> | <b>Synonymous</b> | <b>Splicing</b> | <b>Stop gained/lost</b> |
|------------------|-------------------|---------------|------------|-------------------|-----------------|-------------------------|
| XTMC             | 124,167           | 28,676        | 7,045      | 3,767             | 529             | 79                      |
| Cu2              | 226,266           | 57,651        | 14,836     | 8,049             | 1,164           | 148                     |
| Cuc37            | 408,133           | 98,635        | 24,552     | 13,732            | 1,982           | 207                     |
| Gy14             | 365,750           | 91,737        | 22,927     | 12,916            | 1,834           | 177                     |
| 9110gt           | 241,964           | 60,653        | 14,938     | 8,212             | 1,194           | 116                     |
| Cuc80            | 473,961           | 121,302       | 29,924     | 16,808            | 2,349           | 230                     |
| Cuc64            | 1,024,242         | 266,962       | 67,680     | 38,255            | 5,476           | 517                     |
| W4               | 597,854           | 156,573       | 39,107     | 22,176            | 3,177           | 297                     |
| W8               | 956,246           | 286,806       | 68,695     | 39,147            | 6,243           | 478                     |
| Hx14             | 532,744           | 135,384       | 33,717     | 19,090            | 2,693           | 273                     |
| Hx117            | 479,672           | 121,386       | 30,029     | 16,928            | 2,402           | 223                     |

127

128 **Supplementary Table 16. Functional impact of identified small InDels.**

129

| <b>Accession</b> | <b>Intergenic</b> | <b>Intron</b> | <b>CDS</b> | <b>Frameshift</b> | <b>Splicing</b> | <b>Stop gained/lost</b> |
|------------------|-------------------|---------------|------------|-------------------|-----------------|-------------------------|
| XTMC             | 98,967            | 20,198        | 2,169      | 1,993             | 349             | 52                      |
| Cu2              | 108,004           | 22,688        | 1,854      | 1,415             | 395             | 22                      |
| Cuc37            | 173,494           | 34,952        | 2,015      | 1,397             | 589             | 47                      |
| Gy14             | 148,616           | 34,170        | 3,024      | 2,441             | 610             | 55                      |
| 9110gt           | 143,705           | 29,440        | 2,826      | 2,424             | 541             | 52                      |
| Cuc80            | 161,958           | 35,077        | 1,889      | 1,140             | 619             | 42                      |
| Cuc64            | 337,519           | 73,655        | 3,678      | 2,048             | 1,250           | 105                     |
| W4               | 223,678           | 49,625        | 3,549      | 2,603             | 920             | 69                      |
| W8               | 318,785           | 84,312        | 5,367      | 3,673             | 1,740           | 145                     |
| Hx14             | 220,694           | 45,734        | 2,951      | 2,157             | 791             | 72                      |
| Hx117            | 211,660           | 48,947        | 5,462      | 4,706             | 903             | 88                      |

130

131 **Supplementary Table 17. Summary of identified canonical insertions.**

132

| <b>Accession</b> | <b>No. of SVs</b> | <b>Total length (bp)</b> | <b>Average length (bp)</b> | <b>Max length (bp)</b> | <b>No. of SVs in coding regions</b> | <b>No. of SV-impacted genes</b> | <b>No. of SVs in domestication sweeps</b> |
|------------------|-------------------|--------------------------|----------------------------|------------------------|-------------------------------------|---------------------------------|-------------------------------------------|
| XTMC             | 1,096             | 2,652,489                | 2,420                      | 83,374                 | 27                                  | 27                              | 24                                        |
| Cu2              | 1,664             | 2,910,918                | 1,749                      | 62,006                 | 36                                  | 34                              | 26                                        |
| Cuc37            | 3,004             | 4,050,490                | 1,348                      | 63,426                 | 54                                  | 52                              | 43                                        |
| Gy14             | 2,504             | 3,017,529                | 1,205                      | 52,071                 | 39                                  | 39                              | 33                                        |
| 9110gt           | 1,797             | 2,552,245                | 1,420                      | 41,500                 | 30                                  | 29                              | 29                                        |
| Cuc80            | 3,524             | 4,032,632                | 1,144                      | 44,595                 | 61                                  | 56                              | 36                                        |
| Cuc64            | 7,296             | 6,666,180                | 914                        | 74,908                 | 94                                  | 92                              | 490                                       |
| W4               | 4,387             | 4,849,062                | 1,105                      | 51,319                 | 71                                  | 66                              | 280                                       |
| W8               | 7,577             | 7,183,410                | 948                        | 62,932                 | 95                                  | 95                              | 531                                       |
| Hx14             | 3,601             | 3,921,620                | 1,089                      | 56,862                 | 62                                  | 55                              | 124                                       |
| Hx117            | 3,331             | 3,997,964                | 1,200                      | 53,205                 | 60                                  | 56                              | 105                                       |
| <b>Total</b>     | <b>17,130</b>     | <b>24,816,009</b>        | <b>1,449</b>               | <b>83,374</b>          | <b>333</b>                          | <b>291</b>                      | <b>940</b>                                |

133

134 **Supplementary Table 18. Summary of identified canonical deletions.**

135

| <b>Accession</b> | <b>No. of SVs</b> | <b>Total length (bp)</b> | <b>Average length (bp)</b> | <b>Max length (bp)</b> | <b>No. of SVs in coding regions</b> | <b>No. of SV-impacted genes</b> | <b>No. of SVs in domestication sweeps</b> |
|------------------|-------------------|--------------------------|----------------------------|------------------------|-------------------------------------|---------------------------------|-------------------------------------------|
| XTMC             | 1,231             | 2,054,473                | 1,669                      | 136,303                | 63                                  | 121                             | 28                                        |
| Cu2              | 2,167             | 2,852,805                | 1,316                      | 136,315                | 121                                 | 168                             | 44                                        |
| Cuc37            | 3,154             | 3,305,045                | 1,048                      | 130,439                | 132                                 | 173                             | 56                                        |
| Gy14             | 2,964             | 3,531,394                | 1,191                      | 136,303                | 126                                 | 175                             | 53                                        |
| 9110gt           | 2,096             | 2,557,241                | 1,220                      | 135,907                | 108                                 | 167                             | 48                                        |
| Cuc80            | 3,458             | 3,634,360                | 1,051                      | 68,158                 | 158                                 | 200                             | 33                                        |
| Cuc64            | 6,702             | 5,846,932                | 872                        | 46,048                 | 288                                 | 360                             | 478                                       |
| W4               | 4,667             | 4,336,096                | 929                        | 136,303                | 209                                 | 269                             | 316                                       |
| W8               | 7,284             | 6,056,794                | 832                        | 39,892                 | 282                                 | 358                             | 516                                       |
| Hx14             | 4,153             | 3,761,191                | 906                        | 137,097                | 161                                 | 213                             | 210                                       |
| Hx117            | 3,844             | 3,829,068                | 996                        | 135,907                | 183                                 | 248                             | 144                                       |
| <b>Total</b>     | <b>19,334</b>     | <b>13,398,747</b>        | <b>693</b>                 | <b>137,097</b>         | <b>1,012</b>                        | <b>930</b>                      | <b>1,143</b>                              |

136



137 **Supplementary Table 19. Summary of identified complex insertions.**

138

| <b>Accession</b> | <b>No. of SVs</b> | <b>Total length (bp)</b> | <b>Average length (bp)</b> | <b>Max length (bp)</b> | <b>No. of SVs in coding regions</b> | <b>No. of SV-impacted genes</b> | <b>No. of SVs in domestication sweeps</b> |
|------------------|-------------------|--------------------------|----------------------------|------------------------|-------------------------------------|---------------------------------|-------------------------------------------|
| XTMC             | 466               | 941,180                  | 2,020                      | 36,781                 | 3                                   | 3                               | 0                                         |
| Cu2              | 878               | 1,923,063                | 2,190                      | 124,097                | 6                                   | 5                               | 1                                         |
| Cuc37            | 1,350             | 1,582,073                | 1,172                      | 40,947                 | 8                                   | 12                              | 1                                         |
| Gy14             | 1,087             | 1,372,550                | 1,263                      | 53,035                 | 13                                  | 10                              | 1                                         |
| 9110gt           | 795               | 996,796                  | 1,254                      | 25,349                 | 5                                   | 9                               | 1                                         |
| Cuc80            | 1,520             | 1,612,252                | 1,061                      | 48,778                 | 7                                   | 5                               | 1                                         |
| Cuc64            | 3,708             | 3,683,408                | 993                        | 72,828                 | 14                                  | 11                              | 15                                        |
| W4               | 2,030             | 2,137,196                | 1,053                      | 36,855                 | 11                                  | 8                               | 14                                        |
| W8               | 3,707             | 4,020,383                | 1,085                      | 72,828                 | 10                                  | 8                               | 25                                        |
| Hx14             | 1,717             | 2,390,015                | 1,392                      | 86,501                 | 7                                   | 6                               | 4                                         |
| Hx117            | 1,544             | 2,313,902                | 1,499                      | 87,193                 | 7                                   | 8                               | 5                                         |
| <b>Total</b>     | <b>9,399</b>      | <b>9,673,969</b>         | <b>1,029</b>               | <b>124,097</b>         | <b>78</b>                           | <b>63</b>                       | <b>46</b>                                 |

139

140 **Supplementary Table 20. Summary of identified complex deletions.**

141

| <b>Accession</b> | <b>No. of SVs</b> | <b>Total length (bp)</b> | <b>Average length (bp)</b> | <b>Max length (bp)</b> | <b>No. of SVs in coding regions</b> | <b>No. of SV-impacted genes</b> | <b>No. of SVs in domestication sweeps</b> |
|------------------|-------------------|--------------------------|----------------------------|------------------------|-------------------------------------|---------------------------------|-------------------------------------------|
| XTMC             | 417               | 615,267                  | 1,475                      | 39,889                 | 43                                  | 43                              | 3                                         |
| Cu2              | 819               | 1,104,607                | 1,349                      | 86,970                 | 58                                  | 88                              | 6                                         |
| Cuc37            | 1,130             | 1,198,757                | 1,061                      | 89,618                 | 73                                  | 99                              | 2                                         |
| Gy14             | 912               | 686,441                  | 753                        | 15,699                 | 51                                  | 51                              | 4                                         |
| 9110gt           | 722               | 637,701                  | 883                        | 24,333                 | 43                                  | 46                              | 2                                         |
| Cuc80            | 1,276             | 1,016,786                | 797                        | 46,430                 | 73                                  | 82                              | 3                                         |
| Cuc64            | 2,745             | 2,522,027                | 919                        | 82,614                 | 176                                 | 212                             | 182                                       |
| W4               | 1,654             | 1,646,538                | 995                        | 60,231                 | 128                                 | 131                             | 114                                       |
| W8               | 2,690             | 2,053,505                | 763                        | 32,483                 | 162                                 | 165                             | 163                                       |
| Hx14             | 1,403             | 1,063,863                | 758                        | 23,815                 | 81                                  | 89                              | 61                                        |
| Hx117            | 1,246             | 862,205                  | 692                        | 15,699                 | 73                                  | 71                              | 33                                        |
| <b>Total</b>     | <b>8,049</b>      | <b>7,627,939</b>         | <b>948</b>                 | <b>89,618</b>          | <b>634</b>                          | <b>600</b>                      | <b>390</b>                                |

142

143 **Supplementary Table 21. Summary of identified inversions.**

144

| <b>Accession</b> | <b>No. of SVs</b> | <b>Total length (bp)</b> | <b>Average length (bp)</b> | <b>Max length (bp)</b> | <b>No. of SVs in coding regions</b> | <b>No. of SV-impacted genes</b> | <b>No. of SVs in domestication sweeps</b> |
|------------------|-------------------|--------------------------|----------------------------|------------------------|-------------------------------------|---------------------------------|-------------------------------------------|
| XTMC             | 9                 | 629,759                  | 69,973                     | 291,854                | 7                                   | 58                              | 0                                         |
| Cu2              | 20                | 721,223                  | 36,061                     | 239,883                | 12                                  | 78                              | 0                                         |
| Cuc37            | 21                | 664,972                  | 31,665                     | 239,883                | 10                                  | 60                              | 0                                         |
| Gy14             | 22                | 723,449                  | 32,884                     | 241,786                | 9                                   | 71                              | 0                                         |
| 9110gt           | 13                | 321,468                  | 24,728                     | 258,396                | 3                                   | 27                              | 0                                         |
| Cuc80            | 39                | 966,556                  | 24,783                     | 249,794                | 16                                  | 73                              | 0                                         |
| Cuc64            | 40                | 1,415,520                | 35,388                     | 435,827                | 26                                  | 155                             | 3                                         |
| W4               | 37                | 1,332,367                | 36,010                     | 347,532                | 21                                  | 145                             | 2                                         |
| W8               | 42                | 1,005,309                | 23,936                     | 478,382                | 19                                  | 107                             | 4                                         |
| Hx14             | 35                | 1,682,476                | 48,071                     | 454,038                | 19                                  | 164                             | 1                                         |
| Hx117            | 21                | 926,075                  | 44,099                     | 239,883                | 11                                  | 88                              | 2                                         |
| <b>Total</b>     | <b>196</b>        | <b>5,469,389</b>         | <b>27,905</b>              | <b>478,382</b>         | <b>109</b>                          | <b>521</b>                      | <b>9</b>                                  |

145

146 **Supplementary Table 22. Summary of identified intra-chromosomal translocations.**

147

| <b>Accession</b> | <b>No. of SVs</b> | <b>Total length (bp)</b> | <b>Average length (bp)</b> | <b>Max length (bp)</b> | <b>No. of SVs in coding regions</b> | <b>No. of SV-impacted genes</b> | <b>No. of SVs in domestication sweeps</b> |
|------------------|-------------------|--------------------------|----------------------------|------------------------|-------------------------------------|---------------------------------|-------------------------------------------|
| XTMC             | 29                | 529,688                  | 18,265                     | 150,053                | 7                                   | 27                              | 0                                         |
| Cu2              | 66                | 937,882                  | 14,210                     | 233,246                | 14                                  | 79                              | 2                                         |
| Cuc37            | 71                | 1,222,129                | 17,213                     | 282,061                | 23                                  | 101                             | 1                                         |
| Gy14             | 66                | 1,799,469                | 27,265                     | 709,697                | 19                                  | 139                             | 5                                         |
| 9110gt           | 42                | 741,868                  | 17,664                     | 204,724                | 14                                  | 58                              | 0                                         |
| Cuc80            | 98                | 1,531,185                | 15,624                     | 182,755                | 40                                  | 93                              | 0                                         |
| Cuc64            | 104               | 753,960                  | 7,250                      | 77,356                 | 22                                  | 57                              | 1                                         |
| W4               | 85                | 2,069,984                | 24,353                     | 319,737                | 35                                  | 212                             | 5                                         |
| W8               | 125               | 2,531,322                | 20,251                     | 816,765                | 30                                  | 190                             | 2                                         |
| Hx14             | 61                | 1,660,993                | 27,229                     | 282,061                | 23                                  | 143                             | 2                                         |
| Hx117            | 52                | 1,317,101                | 25,329                     | 250,449                | 17                                  | 84                              | 0                                         |
| <b>Total</b>     | <b>702</b>        | <b>9,694,700</b>         | <b>13,810</b>              | <b>816,765</b>         | <b>226</b>                          | <b>775</b>                      | <b>17</b>                                 |

148

149 **Supplementary Table 23. Summary of identified inter-chromosomal translocations.**

150

| <b>Accession</b> | <b>No. of SVs</b> | <b>Total length (bp)</b> | <b>Average length (bp)</b> | <b>Max length (bp)</b> | <b>No. of SVs in coding regions</b> | <b>No. of SV-impacted genes</b> | <b>No. of SVs in domestication sweeps</b> |
|------------------|-------------------|--------------------------|----------------------------|------------------------|-------------------------------------|---------------------------------|-------------------------------------------|
| XTMC             | 34                | 622,298                  | 18,303                     | 283,468                | 7                                   | 53                              | 1                                         |
| Cu2              | 106               | 1,179,689                | 11,129                     | 205,505                | 17                                  | 46                              | 4                                         |
| Cuc37            | 213               | 2,634,411                | 12,368                     | 255,733                | 47                                  | 99                              | 5                                         |
| Gy14             | 130               | 1,155,519                | 8,889                      | 283,468                | 20                                  | 70                              | 2                                         |
| 9110gt           | 90                | 1,213,231                | 13,480                     | 230,797                | 20                                  | 102                             | 2                                         |
| Cuc80            | 280               | 3,480,956                | 12,432                     | 257,407                | 48                                  | 87                              | 5                                         |
| Cuc64            | 204               | 1,310,580                | 6,424                      | 239,431                | 27                                  | 74                              | 7                                         |
| W4               | 191               | 1,309,654                | 6,857                      | 251,410                | 29                                  | 82                              | 4                                         |
| W8               | 242               | 1,351,703                | 5,586                      | 243,658                | 26                                  | 79                              | 6                                         |
| Hx14             | 144               | 1,714,879                | 11,909                     | 221,866                | 33                                  | 93                              | 3                                         |
| Hx117            | 161               | 1,133,605                | 7,041                      | 72,643                 | 27                                  | 53                              | 6                                         |
| <b>Total</b>     | <b>1,404</b>      | <b>7,043,821</b>         | <b>5,017</b>               | <b>283,468</b>         | <b>232</b>                          | <b>257</b>                      | <b>33</b>                                 |

151

152 **Supplementary Table 24. Number of canonical deletions detected in the 11 cucumber**  
 153 **accessions that were supported by Illumina reads.**  
 154

| <b>Accession</b> | <b>No. of all canonical deletions</b> | <b>No. of canonical deletions supported by Illumina reads</b> | <b>Percentage (%)</b> |
|------------------|---------------------------------------|---------------------------------------------------------------|-----------------------|
| XTMC             | 1,231                                 | 858                                                           | 69.69                 |
| Cu2              | 2,167                                 | 1,572                                                         | 72.54                 |
| Cuc37            | 3,154                                 | 2,751                                                         | 87.22                 |
| Gy14             | 2,964                                 | 2,443                                                         | 82.42                 |
| 9110gt           | 2,096                                 | 1,643                                                         | 78.38                 |
| Cuc80            | 3,458                                 | 3,197                                                         | 92.45                 |
| Cuc64            | 6,702                                 | 5,373                                                         | 80.17                 |
| W4               | 4,667                                 | 3,552                                                         | 76.10                 |
| W8               | 7,284                                 | 6,230                                                         | 85.52                 |
| Hx14             | 4,153                                 | 3,545                                                         | 85.35                 |
| Total            | 3,844                                 | 2,914                                                         | 75.80                 |

155

156 **Supplementary Table 25. Number of canonical insertions detected in the 11 cucumber**  
157 **accessions that were supported by Illumina reads.**

158

---

| <b>Accession</b> | <b>No. of all canonical insertions</b> | <b>No. of canonical insertions supported by Illumina reads</b> | <b>Percentage (%)</b> |
|------------------|----------------------------------------|----------------------------------------------------------------|-----------------------|
| XTMC             | 1,097                                  | 982                                                            | 89.52                 |
| Cu2              | 1,665                                  | 1,562                                                          | 93.81                 |
| Cuc37            | 3,005                                  | 2,815                                                          | 93.68                 |
| Gy14             | 2,505                                  | 2,344                                                          | 93.57                 |
| 9110gt           | 1,798                                  | 1,628                                                          | 90.55                 |
| Cuc80            | 3,525                                  | 3,339                                                          | 94.72                 |
| Cuc64            | 7,297                                  | 7,014                                                          | 96.12                 |
| W4               | 4,388                                  | 4,184                                                          | 95.35                 |
| W8               | 7,578                                  | 7,263                                                          | 95.84                 |
| Hx14             | 3,602                                  | 3,393                                                          | 94.20                 |
| Total            | 3,332                                  | 3,134                                                          | 94.06                 |

---

159

160 **Supplementary Table 26. Number of complex deletions detected in the 11 cucumber**  
 161 **accessions that were supported by Illumina reads.**

162

| <b>Accession</b> | <b>No. of all complex deletions</b> | <b>No. of complex deletions supported by Illumina reads</b> | <b>Percentage (%)</b> |
|------------------|-------------------------------------|-------------------------------------------------------------|-----------------------|
| XTMC             | 417                                 | 301                                                         | 72.18                 |
| Cu2              | 819                                 | 515                                                         | 62.88                 |
| Cuc37            | 1,130                               | 960                                                         | 84.95                 |
| Gy14             | 912                                 | 750                                                         | 82.23                 |
| 9110gt           | 722                                 | 579                                                         | 80.19                 |
| Cuc80            | 1,276                               | 1,096                                                       | 85.89                 |
| Cuc64            | 2,745                               | 1,983                                                       | 72.24                 |
| W4               | 1,654                               | 1,194                                                       | 72.18                 |
| W8               | 2,690                               | 2,232                                                       | 82.97                 |
| Hx14             | 1,403                               | 1,214                                                       | 86.52                 |
| Hx117            | 1,246                               | 899                                                         | 72.15                 |

163



164 **Supplementary Table 27. Number of complex insertions detected in the 11 cucumber**  
 165 **accessions that were supported by Illumina reads.**

166

| <b>Accession</b> | <b>No. of all complex insertions</b> | <b>No. of complex insertions supported by Illumina reads</b> | <b>Percentage (%)</b> |
|------------------|--------------------------------------|--------------------------------------------------------------|-----------------------|
| XTMC             | 467                                  | 400                                                          | 85.65                 |
| Cu2              | 879                                  | 735                                                          | 83.62                 |
| Cuc37            | 1,351                                | 1,239                                                        | 91.71                 |
| Gy14             | 1,088                                | 957                                                          | 87.96                 |
| 9110gt           | 796                                  | 694                                                          | 87.19                 |
| Cuc80            | 1,521                                | 1,365                                                        | 89.74                 |
| Cuc64            | 3,709                                | 3,401                                                        | 91.70                 |
| W4               | 2,031                                | 1,843                                                        | 90.74                 |
| W8               | 3,708                                | 3,374                                                        | 90.99                 |
| Hx14             | 1,718                                | 1,449                                                        | 84.34                 |
| Hx117            | 1,545                                | 1,374                                                        | 88.93                 |

167

168 **Supplementary Table 28. Summary of domestication-associated SVs.**

169

| <b>SV type</b>      | <b>No. of SVs</b> | <b>Total length (bp)</b> | <b>Average length (bp)</b> | <b>Max length (bp)</b> | <b>No. of SVs in coding regions</b> | <b>No. of SVs in gene promoters</b> |
|---------------------|-------------------|--------------------------|----------------------------|------------------------|-------------------------------------|-------------------------------------|
| Canonical insertion | 940               | 1,167,441                | 1,242                      | 31,354                 | 22                                  | 260                                 |
| Canonical deletion  | 1,143             | 718,505                  | 629                        | 36,259                 | 60                                  | 286                                 |
| Complex insertion   | 46                | 8,746                    | 190                        | 971                    | 1                                   | 12                                  |
| Complex deletion    | 390               | 289,326                  | 742                        | 22,816                 | 27                                  | 111                                 |
| Inversion           | 9                 | 82,234                   | 9,137                      | 45,542                 | 6                                   | 6                                   |
| Translocation       | 50                | 1,213,756                | 24,275                     | 709,697                | 8                                   | 0                                   |
| Total               | 2,578             | 3,480,008                | 36,215                     | 846,639                | 124                                 | 675                                 |

170

171 **Supplementary Table 29. Summary of SVs displaying potential domestication signals.**

172

| <b>SV type</b>      | <b>No. of SVs</b> | <b>Total length (bp)</b> | <b>Average length (bp)</b> | <b>Max length (bp)</b> | <b>No. of SVs in coding regions</b> | <b>No. of SVs in gene promoters</b> |
|---------------------|-------------------|--------------------------|----------------------------|------------------------|-------------------------------------|-------------------------------------|
| Canonical insertion | 3,546             | 2,632,703                | 742                        | 41,884                 | 59                                  | 988                                 |
| Canonical deletion  | 2,372             | 1,447,370                | 610                        | 29,490                 | 151                                 | 612                                 |
| Complex insertion   | 1,758             | 1,636,826                | 931                        | 40,252                 | 4                                   | 39                                  |
| Complex deletion    | 966               | 498,026                  | 516                        | 22,816                 | 67                                  | 269                                 |
| Inversion           | 9                 | 23,941                   | 2,660                      | 7,615                  | 13                                  | 5                                   |
| Total               | 8,651             | 6,238,866                | 5,459                      | 41,884                 | 294                                 | 1,913                               |

173

174 **Supplementary Table 30. Number of SVs that possibly altered nearby gene expression during**  
175 **cucumber domestication.**

176

| <b>SV type</b> | <b>Root</b> | <b>Stem</b> | <b>Leaf</b> | <b>Male<br/>flower</b> | <b>Female<br/>flower</b> | <b>Fruit</b> | <b>Tendril</b> | <b>At least<br/>one tissue</b> |
|----------------|-------------|-------------|-------------|------------------------|--------------------------|--------------|----------------|--------------------------------|
| CDS-SV         | 60          | 63          | 51          | 61                     | 61                       | 64           | 65             | 131                            |
| Promoter-SV    | 579         | 631         | 459         | 659                    | 635                      | 657          | 691            | 1,480                          |
| Total          | 639         | 694         | 510         | 720                    | 696                      | 721          | 756            | 1,611                          |

177

178 **Supplementary references**

- 179 1. Qi, J. *et al.* A genomic variation map provides insights into the genetic basis of cucumber  
180 domestication and diversity. *Nat. Genet.* **45**, 1510-5 (2013).
- 181 2. Tettelin, H. *et al.* Genome analysis of multiple pathogenic isolates of *Streptococcus*  
182 *agalactiae*: implications for the microbial "pan-genome". *Proc. Natl. Acad. Sci. USA* **102**,  
183 13950-5 (2005).
- 184 3. Zhao, Y. *et al.* PanGP: a tool for quickly analyzing bacterial pan-genome profile.  
185 *Bioinformatics* **30**, 1297-9 (2014).

186
