# Supplementary material for: Graph-based pan-genome reveals structural and sequence variations related to agronomic traits and domestication in cucumber
Source: PubMed Central journal article supplement (PMC8813957; doi:10.1038/s41467-022-28362-0), 2022-02-03
Supplement: 41467_2022_28362_MOESM3_ESM.pdf [file 41467_2022_28362_MOESM3_ESM.pdf]

### **Description of Additional Supplementary Files**

File Name: Supplementary Data 1

Description: Number of members of the 435 LTR-RT family in the 12 cucumber accessions.

File Name: Supplementary Data 2

Description: Matrix of 26,822 nonredundant pan-genes.

File Name: Supplementary Data 3

Description: Information of SVs identified from 12 cucumber genomes.

File Name: Supplementary Data 4

Description: Summary of SVs that affected gene CDS.

File Name: Supplementary Data 5

Description: Summary of identified selective sweeps.

File Name: Supplementary Data 6

Description: Summary of domestication-associated SVs.

File Name: Supplementary Data 7

Description: Summary of potential domestication-associated SVs.

File Name: Supplementary Data 8

Description: Summary of CDS-SVs displaying significantly altered expression of the closest gene in at least one tissue.

File Name: Supplementary Data 9

Description: Summary of promoter-SVs displaying significantly altered expression of the closest in at least one tissue.
